# Supplementary material for: Biomass Yield and Economic, Energy and Carbon Balances of Ulmus pumila L., Robinia pseudoacacia L. and Populus × euroamericana (Dode) Guinier Short-Rotation Coppices on Degraded Lands under Mediterranean Climate
Source: MDPI journal article supplement (doi:10.3390/f12101337), 2021-09-29
Supplement: s1 [file s1]

Article

# Biomass yield and economic, energy and carbon balances of *Ulmus pumila* L., *Robinia pseudoacacia* L. and *Populus × euroamericana* (Dode) Guinier short rotation coppices on degraded lands under Mediterranean climate

Patricia Alesso <sup>1</sup>, Raúl Tapias <sup>1</sup>, Joaquín Alaejos <sup>1</sup> and Manuel Fernández <sup>1,\*</sup>

<sup>1</sup> Department of Agroforestry Sciences, School of Engineering, University of Huelva, 21071 Huelva, Spain; palesso@hotmail.com (P.A.); rtapias@dcaf.uhu.es (R.T.); jalagut@dcaf.uhu.es (J.A.)

<sup>2</sup> Affiliation 2; e-mail@e-mail.com

\* Correspondence: manuel.fernandez@dcaf.uhu.es (M.F.); Tel.: 34 959217712; Fax: 34 959217560

## SUPPLEMENTARY MATERIAL

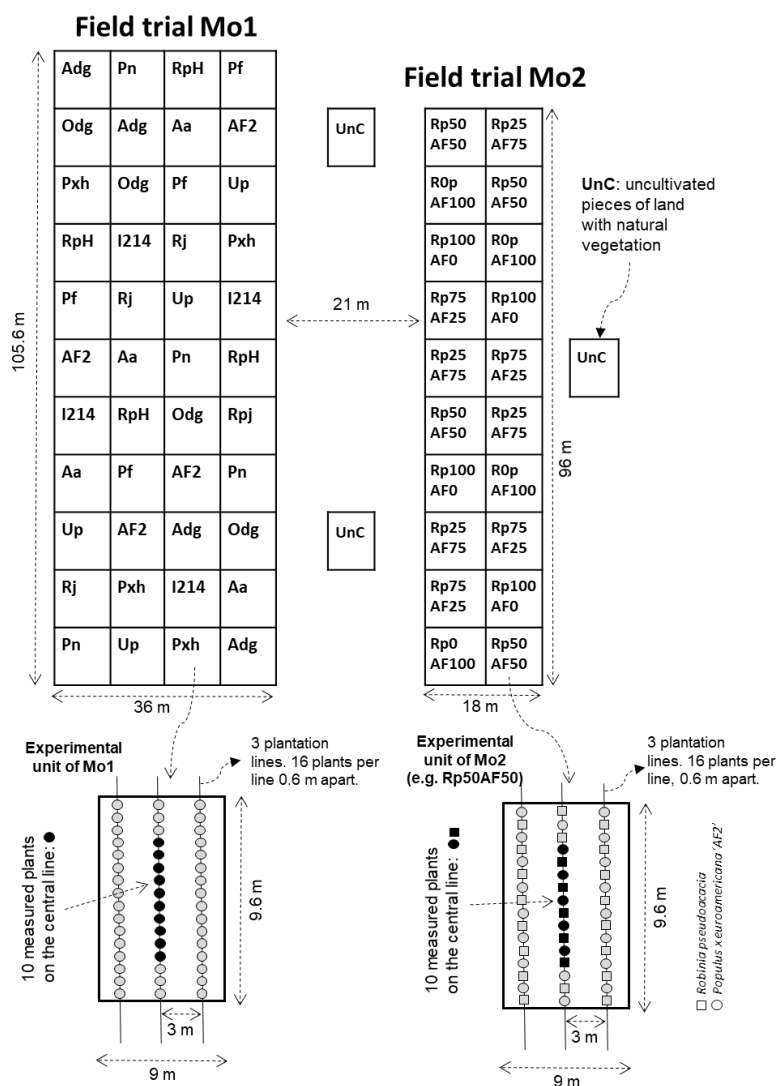

**Figure S1.** Schematic representation of the experimental design of the Mo1 (left) and Mo2 (right) field trials. Mo1 field trial: four hybrid clones of *Populus × euroamericana* (Dode) Guinier (clones ‘Adige’ [Adg], ‘AF2’ [AF2], ‘Oudenberg’ [Odg], I214 [I214]); one hybrid clone of *Populus × interamericana* van Broekhuizen (clone ‘Raspalje’ [Rj]); Pf, one clone of *Paulownia fortunei* (Seem.) Hemsl. (clone ‘UHU’); RpH (*Robinia pseudoacacia*, improved cultivar ‘Nyírségi’); commercial nursery plants of *Populus nigra* L. [Pn], *Ailanthus altissima* (Mill) Swingle. [Aa], *Platanus × hispanica* Mill. ex Münchh. [Pxh], and *Ulmus pumila* L. [Up]. Mo2 Treatments (combinations of the five different species compositions): 100% AF2 (Rp0-AF100); 25% Rp-G + 75% AF2 (Rp25-AF75); 50% Rp-G + 50% AF2 (Rp50-AF50); 75% Rp-G + 25% AF2 (Rp75-AF25); 100% Rp-G (Rp100-AF0). Rp-G (*Robinia pseudoacacia*, commercial nursery plants from Germany).

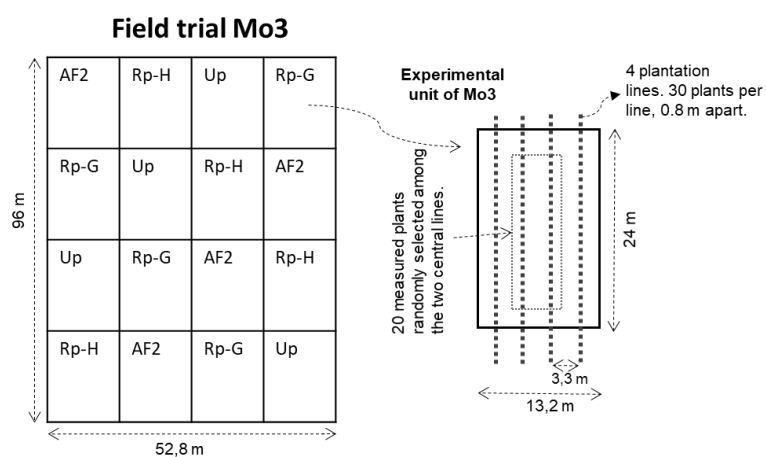

**Figure S2.** Schematic representation of the experimental design of the Mo3 field trial. AF2 (*Populus × euroamericana* ‘AF2’), Rp-H and Rp-G (*Robinia pseudoacacia* cultivar ‘Nyírségi’ and German provenance, respectively); Up (*Ulmus pumila*).

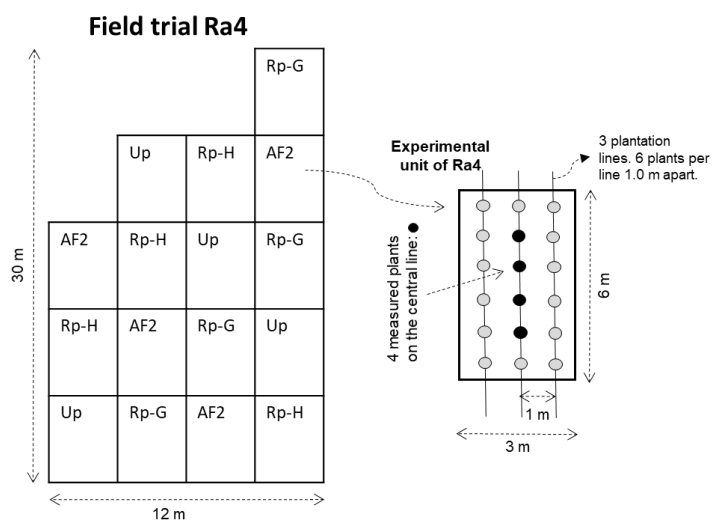

**Figure S3.** Schematic representation of the experimental design of the Ra4 field trial. AF2 (*Populus × euroamericana* ‘AF2’), Rp-H and Rp-G (*Robinia pseudoacacia* cultivar ‘Nyírségi’ and German provenance, respectively); Up (*Ulmus pumila*).

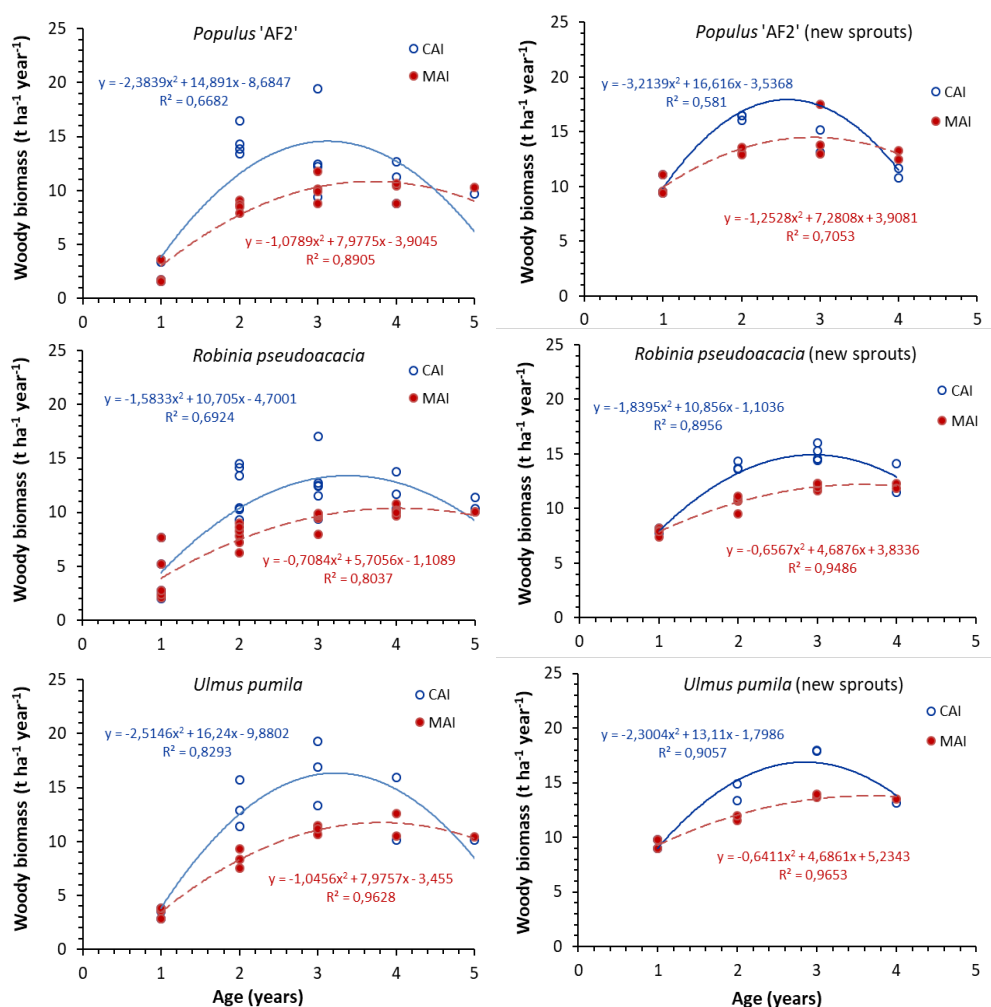

**Figure S4.** Current annual increment (CAI) and mean annual increment (MAI) of the woody biomass dry weight of the above-ground part of the plant (AGWB) throughout the period studied for the 1<sup>st</sup> (left) and 2<sup>nd</sup> (right) rotations and the three taxa. Data from all field trials are shown as a whole. Taxa: *Populus* AF2 (*Populus* × *euroamericana* 'AF2'), *Robinia pseudoacacia* (including cultivar 'Nyírségi' and German provenance); *Ulmus pumila*.

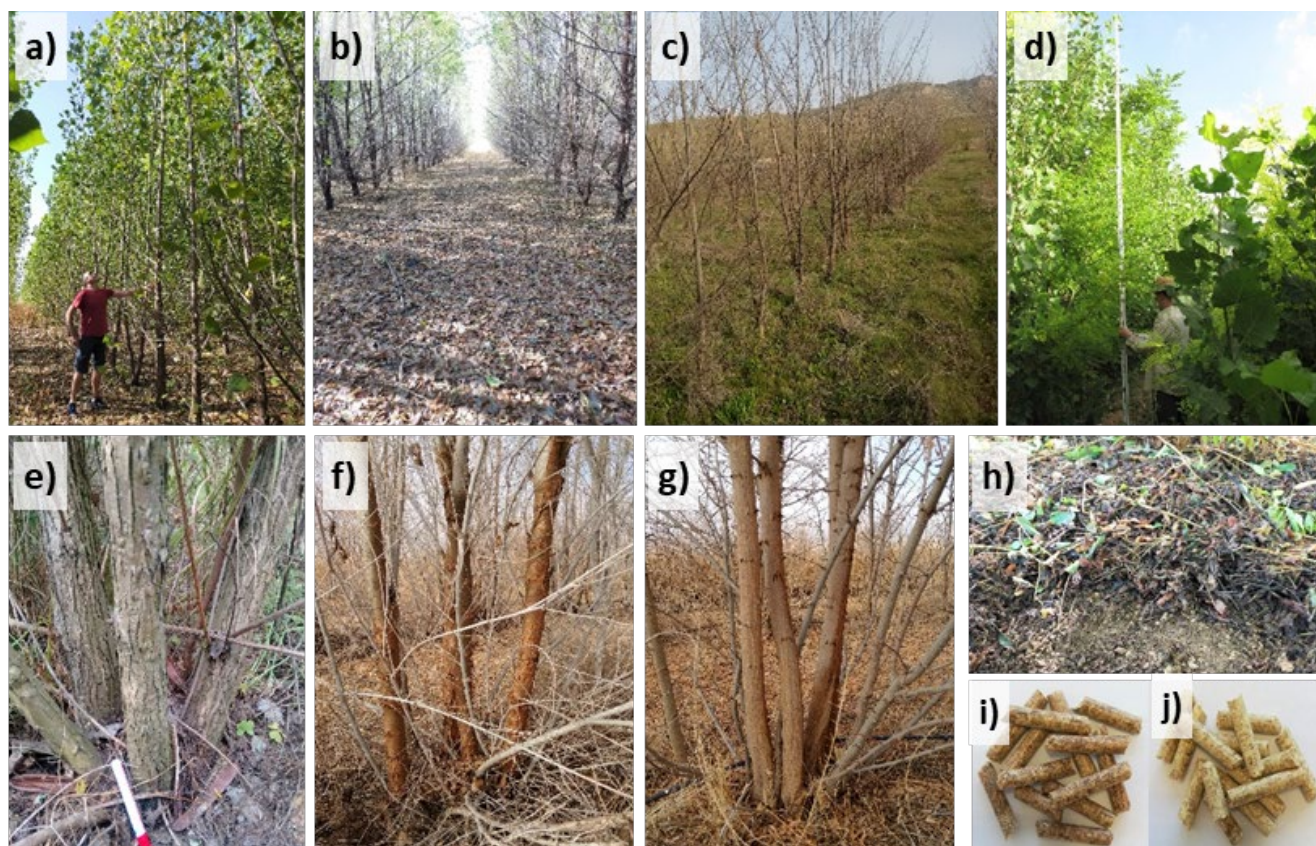

**Figure S5.** **a)** 3.5-years-old *Populus × euroamericana* 'AF2'; 1<sup>st</sup> rotation. **b)** 3.5-years-old *Ulmus pumila*; 1<sup>st</sup> rotation; it can be seen the litter layer on the soil surface; **c)** 2.0-years-old *Robinia pseudoacacia*; 1<sup>st</sup> rotation; it can be seen the grass grown during the cold season, which can be grazed by sheep. **d)** 2.0-years-old mixed plantation of *Populus × euroamericana* 'AF2' and *Robinia pseudoacacia*; 1<sup>st</sup> rotation. **e, f, g)** 3.0-years-old sprouts of *Populus × euroamericana* 'AF2', *Ulmus pumila* and *Robinia pseudoacacia*, respectively; 2<sup>nd</sup> rotation. **h)** Litterfall of *Robinia pseudoacacia*. **i, j)** Wood pellets from *Ulmus pumila* and *Robinia pseudoacacia*, respectively.

**Table S1.** Physical-chemical characteristics of the upper soil layer at the beginning of the experiments [mean (SE)]. *Mo* (Los Morales), *Ra* (La Rábida).

| Variable                                      | Field trials<br>Mo1 and Mo2 | Field trial<br>Mo3 | Field trial<br>Ra4 |                    |
|-----------------------------------------------|-----------------------------|--------------------|--------------------|--------------------|
| Sampling date                                 | March 2011                  | March 2015         | March 2015         |                    |
| Soil layer thickness (cm)                     | 0 – 30                      | 0 – 30             | 0 – 15             | 15 – 30            |
| Soil texture                                  | Clay loam                   | Clay loam          | Sandy loam         | Sandy loam         |
| Clay/silt/sand (%)                            | 28.9 / 27.6 / 43.4          | 28.3 / 31.4 / 40.5 | 11.3 / 14.9 / 73.8 | 10.8 / 15.0 / 74.2 |
| Fine soil (< 2 mm particle-size)              | 80.8                        | 80.8               | 76.5               | 76.7               |
| Bulk density (kg dm <sup>-3</sup> )           | 1.32                        | 1.32               | 1.55               | 1.55               |
| pH                                            | 8.30 (0.02)                 | 8.25 (0.05)        | 8.62 (0.07)        | 8.68 (0.06)        |
| Electric Conductivity (µS cm <sup>-1</sup> )  | 325 (6)                     | 331 (3)            | 136 (1)            | 135 (3)            |
| Exchangeable Sodium Percentage (%)            | 3.9 (0.2)                   | 5.4 (0.1)          | 9.1 (0.3)          | 12.7 (0.1)         |
| Organic Matter (%)                            | 2.93 (0.09)                 | 2.67 (0.03)        | 1.22 (0.02)        | 0.53 (0.05)        |
| C/N ratio                                     | 10.64 (0.46)                | 9.16 (0.04)        | 11.27 (0.04)       | 13.74 (0.76)       |
| Cation Exchange Capacity (meq/100 g)          | 16.2 (1.0)                  | 16.24 (0.07)       | 6.27 (0.25)        | 5.14 (0.10)        |
| Carbonates (%)                                | 16.2 (1.7)                  | 11.2 (0.04)        | 11.28 (0.08)       | 10.48 (0.15)       |
| Active limestone (%)                          | 7.57 (0.31)                 | 3.31 (0.03)        | 1.27 (0.05)        | 1.71 (0.08)        |
| N (%)                                         | 0.16 (0.01)                 | 0.15 (0.01)        | 0.06 (0.01)        | 0.04 (0.01)        |
| Organic Carbon (%)                            | 1.51 (0.04)                 | 1.46 (0.03)        | 0.71 (0.02)        | 0.31 (0.03)        |
| Total P (mg kg <sup>-1</sup> ) <sup>(1)</sup> | 88.8 (2.5)                  | 78.4 (5.0)         | 59.6 (2.0)         | 42.9 (1.5)         |
| Available Ca (meq/100 g)                      | 41.6 (0.9)                  | 47.5 (0.4)         | 28.4 (0.4)         | 28.9 (0.5)         |
| Available Mg (meq/100 g)                      | 4.67 (0.28)                 | 5.15 (0.04)        | 2.97 (0.05)        | 2.81 (0.06)        |
| Available K (meq/100 g)                       | 1.37 (0.09)                 | 1.40 (0.07)        | 0.27 (0.01)        | 0.21 (0.01)        |
| B (mg kg <sup>-1</sup> )                      | 2.20 (0.32)                 | 1.75 (0.10)        | 1.83 (0.05)        | 1.19 (0.04)        |
| Fe (mg kg <sup>-1</sup> )                     | 21.5 (1.0)                  | 16.2 (0.2)         | 70.8 (0.7)         | 60.5 (0.8)         |
| Mn (mg kg <sup>-1</sup> )                     | 59.6 (8.5)                  | 71.2 (0.5)         | 29.2 (0.6)         | 26.8 (0.3)         |
| Zn (mg kg <sup>-1</sup> )                     | 4.4 (0.4)                   | 3.88 (0.2)         | 20.771 (0.9)       | 7.7 (0.6)          |
| Cu (mg kg <sup>-1</sup> )                     | 2.1 (0.1)                   | 2.1 (0.1)          | 93.5 (3.2)         | 43.6 (2.6)         |

<sup>(1)</sup> The available P (Olsen Method) averaged: 5.21 (0.41) mg kg<sup>-1</sup> [mean (SE)] in the Mo1 and Mo2 trials; 4.02 (0.36) in the Mo3; and 3.59 (0.19) and 2.35 (0.20) for 0–15 and 15–30 cm layers, respectively, in the Ra4 trial.

**Table S2.** Relationships between stem diameter measured at 10 cm above ground (*D*, mm) and plant height (*H*, cm).  $H = a D^2 + b D + c$ . *D* ranged from 6 to 170 mm. *r* = Pearson coefficient. Significance level,  $p < 0.001$  for all cases. *n* = sample size.

| Taxon                                      | <i>a</i> | <i>b</i> | <i>c</i> | <i>r</i> | <i>n</i> |
|--------------------------------------------|----------|----------|----------|----------|----------|
| <i>Populus × euroamericana</i> ‘Adige’     | -0.005   | 8.521    | -25.453  | 0.959    | 222      |
| <i>Populus × euroamericana</i> ‘AF2’       | -0.024   | 9.413    | 14.615   | 0.930    | 102      |
| <i>Populus × euroamericana</i> ‘Oudenberg’ | -0.026   | 9.435    | 8.835    | 0.935    | 190      |
| <i>Populus × euroamericana</i> ‘I214’      | 0.010    | 7.210    | 6.544    | 0.949    | 180      |
| <i>Populus × interamericana</i> ‘Raspalje’ | -0.027   | 9.540    | -17.48   | 0.949    | 140      |
| <i>Populus nigra</i> L.                    | -0.004   | 6.754    | 40.558   | 0.972    | 62       |
| <i>Paulownia fortunei</i> ‘UHU’            | -0.021   | 10.531   | -175.61  | 0.937    | 216      |
| <i>Robinia pseudoacacia</i>                | -0.036   | 9.237    | 3.716    | 0.926    | 126      |
| <i>Ulmus pumila</i>                        | 0.014    | 7.065    | 42.865   | 0.955    | 76       |
| <i>Ailanthus altissima</i>                 | -0.009   | 7.762    | -42.304  | 0.964    | 84       |
| <i>Platanus × hispanica</i>                | 0.025    | 5.289    | 46.883   | 0.923    | 86       |

**Table S3.** Standard technical methods and instruments used to assess the physical-chemical properties of plant material, soil and litterfall. Modified from [12].

| Property                                     | Technical method                                                                                              | Observations                                                                                                                                      |
|----------------------------------------------|---------------------------------------------------------------------------------------------------------------|---------------------------------------------------------------------------------------------------------------------------------------------------|
| N                                            | Kjedahl method (auto-analyser Bran+Luebbe®, Mod. AIII).                                                       | Plant, litterfall and soil.                                                                                                                       |
| S, C                                         | Elemental analyzer (Thermo Scientific™ FLASH 2000).                                                           | Plant and litterfall.                                                                                                                             |
| K, Ca, P, Mg                                 | ICP-OES (Thermo Jarrell Ash Corporation). Olsen method for soil available P.                                  | Plant, litterfall and soil.<br>Extraction with HNO <sub>3</sub> ; extraction with ammonium acetate for soil available K.                          |
| pH, Electrical conductivity (EC)             | Multiparameter bench (PC 80, XS® Instruments)                                                                 | Soil.<br>Volume fraction 1:2.5 for pH and 1:5 for EC.                                                                                             |
| Organic C and oxidizable organic matter (OM) | Walkley and Black method.                                                                                     | Soil.                                                                                                                                             |
| Active limestone                             | Bernard calcimeter                                                                                            | Soil.                                                                                                                                             |
| Cl                                           | Photometer (HI 83200, Hanna® Instruments).                                                                    | Plant. Total extraction with HNO <sub>3</sub> .                                                                                                   |
| Ash                                          | Muffle oven                                                                                                   | Plant. 550 °C (ISO 18122:2015).                                                                                                                   |
| Heating values (constant volume)             | According to the EU standard EN 14918:2011 for solid biofuels. Automatic isoperibol calorimeter (Parr 6300®). | Plant.<br>Cold milling. Crushed and sieved through a 1 mm size mesh. Data referred to a dry basis after oven-drying at 105 °C (ISO 18134-3:2015). |

**Table S4.** Morphological characteristics [average (SE)] of the main stems emerging from the stumps at the end of the 1<sup>st</sup> (R<sub>04</sub>S<sub>4</sub> plants) and the 2<sup>nd</sup> (R<sub>18</sub>S<sub>4</sub> plants) rotation for the Mo1 assay.  $D_{\max}$ , maximum stem diameter among those emerging from a stump; NSt, number of stems; BA, basal area. The four variables showed significant differences between taxa and between rotations,  $p < 0.001$ .

| Taxon                                      | Rotation        | NSt         | Average $D_{\max}$<br>(mm) | Average $D$<br>(mm) | BA<br>(m <sup>2</sup> ha <sup>-1</sup> ) |
|--------------------------------------------|-----------------|-------------|----------------------------|---------------------|------------------------------------------|
| <i>Populus × euroamericana</i> ‘Adige’     | 1 <sup>st</sup> | 1.60 (0.12) | 77.1 (1.1)                 | 73.0 (1.8)          | 35.6 (1.8)                               |
|                                            | 2 <sup>nd</sup> | 2.77 (0.14) | 69.5 (1.6)                 | 59.2 (1.2)          | 42.9 (1.8)                               |
| <i>Populus × euroamericana</i> ‘AF2’       | 1 <sup>st</sup> | 1.88 (0.16) | 88.3 (2.0)                 | 76.0 (3.4)          | 44.3 (2.0)                               |
|                                            | 2 <sup>nd</sup> | 4.96 (0.19) | 72.5 (1.6)                 | 55.2 (0.7)          | 68.5 (2.2)                               |
| <i>Populus × euroamericana</i> ‘Oudenberg’ | 1 <sup>st</sup> | 1.67 (0.13) | 69.0 (1.0)                 | 59.3 (2.0)          | 25.1 (1.0)                               |
|                                            | 2 <sup>nd</sup> | 2.71 (0.15) | 56.8 (1.0)                 | 20.5 (0.8)          | 30.3 (1.3)                               |
| <i>Populus × euroamericana</i> ‘I214’      | 1 <sup>st</sup> | 1.05 (0.04) | 80.3 (1.8)                 | 80.2 (1.8)          | 29.1 (1.1)                               |
|                                            | 2 <sup>nd</sup> | 3.27 (0.17) | 62.6 (0.9)                 | 52.9 (0.5)          | 40.7 (1.8)                               |
| <i>Populus × interamericana</i> ‘Raspalje’ | 1 <sup>st</sup> | 1.25 (0.09) | 68.8 (1.3)                 | 65.1 (1.7)          | 22.5 (1.0)                               |
|                                            | 2 <sup>nd</sup> | 2.83 (0.14) | 56.8 (0.9)                 | 48.8 (0.8)          | 29.5 (1.1)                               |
| <i>Populus nigra</i> L.                    | 1 <sup>st</sup> | 1.33 (0.10) | 76.2 (2.7)                 | 70.8 (2.7)          | 29.1 (2.0)                               |
|                                            | 2 <sup>nd</sup> | 3.29 (0.15) | 58.8 (1.1)                 | 50.1 (0.8)          | 36.7 (1.8)                               |
| <i>Paulownia fortunei</i> ‘UHU’            | 1 <sup>st</sup> | 1.03 (0.02) | 93.5 (1.9)                 | 93.4 (1.9)          | 38.5 (1.5)                               |
|                                            | 2 <sup>nd</sup> | 2.79 (0.13) | 86.4 (1.6)                 | 68.2 (1.7)          | 58.0 (1.6)                               |
| <i>Robinia pseudoacacia</i>                | 1 <sup>st</sup> | 1.04 (0.01) | 87.9 (2.6)                 | 87.8 (2.6)          | 34.3 (2.0)                               |
|                                            | 2 <sup>nd</sup> | 3.50 (0.15) | 66.8 (1.4)                 | 56.0 (1.1)          | 48.1 (1.6)                               |
| <i>Ulmus pumila</i>                        | 1 <sup>st</sup> | 1.25 (0.11) | 88.9 (2.4)                 | 85.7 (2.7)          | 38.9 (2.4)                               |
|                                            | 2 <sup>nd</sup> | 3.21 (0.13) | 69.5 (1.4)                 | 60.5 (0.9)          | 51.6 (1.7)                               |
| <i>Ailanthus altissima</i>                 | 1 <sup>st</sup> | 1.13 (0.07) | 72.8 (1.7)                 | 70.0 (1.9)          | 24.0 (1.2)                               |
|                                            | 2 <sup>nd</sup> | 3.13 (0.17) | 64.0 (1.1)                 | 51.7 (1.0)          | 37.0 (1.4)                               |
| <i>Platanus × hispanica</i>                | 1 <sup>st</sup> | 1.17 (0.02) | 55.3 (1.2)                 | 53.8 (1.4)          | 14.3 (0.7)                               |
|                                            | 2 <sup>nd</sup> | 3.504(0.18) | 48.0 (1.2)                 | 40.9 (0.8)          | 22.5 (1.2)                               |
